1 Identification and antimicrobial properties of bacteria isolated from naturally  
2 decaying wood

3

4

5 Tanja R. Scheublin<sup>2</sup>, Anna M. Kielak<sup>1</sup>, Marlies van den Berg<sup>1</sup>, Johannes A. van Veen<sup>1</sup>, Wietse de  
6 Boer<sup>1,3,\*</sup>

7

8 <sup>1</sup> Netherlands Institute of Ecology (NIOO-KNAW), Department of Microbial Ecology,  
9 Droevendaalsesteeg 10, 6708 PB Wageningen, The Netherlands

10 <sup>2</sup> Soiltech, Biezenmortelsestraat 57, 5074 RJ Biezenmortel, The Netherlands

11 <sup>3</sup> Soil Biology Group, Wageningen University, Wageningen, The Netherlands

12

13 \* Corresponding author: Netherlands Institute of Ecology (NIOO-KNAW), Department of Microbial  
14 Ecology, Droevendaalsesteeg 10, 6708 PB Wageningen, The Netherlands, Phone: +31 (0)317 473  
15 676, E-mail: [w.deboer@nioo.knaw.nl](mailto:w.deboer@nioo.knaw.nl)

16

17 Running title: antimicrobial properties of wood-inhabiting bacteria

18

19

20

21

## 22 Abstract

23

24 Research on wood decay in forest ecosystems has traditionally focused on wood-rot fungi, which lead  
25 the decay process through attack of the lignocellulose complex. The role of bacteria, which can be  
26 highly abundant, is still unclear. Wood-inhabiting bacteria are thought to be nutritionally dependent on  
27 decay activities of wood-rot fungi. Therefore, we hypothesized that these bacteria are not antagonistic  
28 against wood-rot fungi whereas antagonistic activity against other bacteria may be high (resource  
29 competition). This was examined for decaying wood in temperate forests. We found that the  
30 abundance of cultivable bacteria in decaying wood can be highly variable. The general pattern is an  
31 increase of bacteria with progressive decay, but we also identified several fungi that were apparently  
32 able to exclude bacteria from their woody territory. We established a bacterial collection which is  
33 highly representative for decaying wood with typical wood-inhabiting taxa: *Xanthomonadaceae*,  
34 *Acetobacteraceae*, *Caulobacteraceae*, *Methylovirgula*, *Sphingomonas*, *Burkholderia* and *Granulicella*.  
35 *In vitro* antagonistic activity against other bacteria and fungi was evaluated. In contrast to our  
36 hypothesis, we found surprisingly low antagonistic activity against bacteria (<2% of isolates), while  
37 antagonism against fungi was more prevalent. These results may point at a prominent role of  
38 mycophagy (growth at the expense of living fungi) among wood-inhabiting bacteria.

39

40

41 Keywords: wood decay, antagonism, antibiotics, fungal-bacterial interactions,

42

43

44

45

## 46 Introduction

47

48 The process of wood decay has been extensively studied; both from the perspective of functioning of  
49 forest ecosystems (e.g. carbon and nutrient cycling) and of wood industry and construction (Schmidt  
50 2006; van der Wal *et al* 2013). The main players in aerobically decaying wood are wood-rot fungi.  
51 They lead the process of wood decay with their ability to attack the lignocellulose complex using a  
52 complex machinery of extracellular enzymes and chemical mediators (Dashtban *et al* 2010). The  
53 presence of bacteria in wood decayed by wood-rot fungi has also been demonstrated, though  
54 information on abundance, identity and functional characteristics is still very limited (Johnston *et al*  
55 2016). The contribution of bacteria to wood decay via direct attack of the ligno-cellulose complex is  
56 assumed to be limited to circumstances where fungal decay is suppressed, like in water-logged wood  
57 and foundation piles (Klaassen 2008). However, the indirect influence of bacteria on wood decay via  
58 mutualistic or competitive interactions with wood-rot fungi is potentially large (de Boer and van der  
59 Wal 2008; Johnston *et al* 2016).

60 Information on the bacterial community composition in decaying wood is increasingly  
61 becoming available (Johnston *et al* 2016). Bacterial taxa that are commonly found in decaying wood  
62 include *Acidobacteria*, Alpha-, Beta- and Gammaproteobacteria (*Beijerinckiaceae*, *Burkholderiaceae*,  
63 *Xanthomonadaceae*) and *Actinobacteria* (Hervé *et al* 2014; Hoppe *et al* 2015; Kielak *et al* 2016; Rina-  
64 Kanto *et al* 2016; Tláskal *et al* 2017; Probst *et al* 2018). Bacterial biomass and diversity increases with  
65 progressive decay (Hoppe *et al* 2015; Kielak *et al* 2016; Tláskal *et al* 2017; Probst *et al* 2018 ) and the  
66 relative abundance of some bacterial taxa is associated with the stage of decay, e.g. the genus  
67 *Methylovirgula* is generally found in intermediate to advanced stages. Besides decay stage, tree  
68 species is also influencing the bacterial community composition (Hoppe *et al* 2015). No relationship  
69 between bacterial and fungal communities was found in a pine decay range (Kielak *et al* 2016),  
70 indicating that the physico-chemical parameters of the wood rather than the composition of fungi were  
71 the main determinants for bacterial community composition. In contrast, co-occurrence patterns

72 between fungi and nitrogen fixing bacteria were found in decaying *Fagus* and *Picea* wood (Hoppe et  
73 al 2014).

74 It is well known that bacteria and fungi can have a large impact on each other's growth and  
75 performance via the production of secondary metabolites, but these interactions have hardly been  
76 investigated in the context of wood decay. In contrast, antagonistic interactions among different wood  
77 decaying fungi have received a lot of attention (Boddy 2000; Hiscox *et al* 2018). Wood decaying fungi  
78 heavily compete for substrate and a wide range of antimicrobial compounds have been identified.  
79 These compounds can inhibit fungi as well as bacteria (Suay *et al* 2000; Barros *et al* 2008). In  
80 addition, acidification of wood by fungal production of organic acids, like oxalic acid, have a big  
81 impact on the growth conditions for bacteria. Indeed, a sharp decline in the number of bacteria in  
82 woodblocks on forest soil has been observed after invasion of the blocks by the white-rot fungus  
83 *Hypholoma fasciculare* and rapid acidification rather than toxic compounds were the most likely  
84 cause of this decline (Folman *et al* 2008; de Boer *et al* 2010). In contrast, high bacterial numbers of up  
85 to  $10^{10}$  colony forming units per gram of wood have been observed in naturally acidic, decaying wood  
86 covered with *H. fasciculare* fruiting bodies (Valaskova *et al* 2009). Currently, it is still unclear, how  
87 bacterial abundance and functioning is influenced by wood-rot fungi during the decay process.

88 Conversely, bacteria in decaying wood can also influence wood-rot fungi. Co-inoculation  
89 studies with wood decaying fungi and bacteria have reported positive as well as negative effects on the  
90 decay process (Blanchette and Shaw 1978; Murray and Woodard 2003). Only one study examined the  
91 direct interactions between wood-rot fungi and co-existing bacteria and reported neutral, inhibitory  
92 and in one case stimulatory effects on fungal growth (Kamei *et al* 2012). No studies exist on  
93 antibacterial properties of bacteria from decaying wood. We hypothesize that their combative  
94 strategies are primarily directed towards other bacteria, while leaving the wood-rot fungi unaffected.  
95 This hypothesis is based on the assumption that bacteria in non-saturated decaying wood are  
96 nutritionally dependent on the release of oligomers of wood polymers by decay fungi (de Boer and van  
97 der Wal 2008). To test this hypothesis we aimed to get a collection of bacterial strains that is  
98 representative for different stages of decaying wood in a temperate forest. Of the identified bacterial

99 strains, antibacterial and antifungal properties were determined by *in vitro* screenings. In addition to  
100 identification of antimicrobial properties, we also determined abundance of cultivable bacteria in wood  
101 samples with different wood-rot fungi and in different decay stages.

102

103

## 104 Materials and methods

105

### 106 **Sample collection**

107 Decaying wood samples were collected in a mixed forest close to the village of Wolfheze in the centre  
108 of The Netherlands (51°59'39''N; 5°47'39''E). For a pilot experiment, wood samples from decaying  
109 birch trees with either *Piptoporus betulinus*, *Fomes fomentarius*, *Stereum subtomentosum* or  
110 *Plicaturopsis crispa* fruiting bodies were collected in duplo in autumn 2012. In addition, two  
111 coniferous samples (*Abies* fir and pine wood) with clear visual indications of brown-rot patterns were  
112 collected in the same year. For the main experiment, twenty samples of pine wood (*Pinus sylvestris*) in  
113 different stages of decay were collected in autumn 2013. For all samples, the bark was removed and  
114 slices of wood were surface sterilized under UV light for 30 min. Saw dust was produced with a wood  
115 drill, sterilized with 70% ethanol. Highly decayed wood samples, which could not be drilled, were  
116 fragmented using sterile forceps and scalpel. Frozen saw dust samples from oak stumps two and five  
117 years after cutting (van der Wal *et al* 2015) were included in the pilot.

118

### 119 **Bacterial enumeration and identification**

120 About 0.4 g of fresh saw dust was weighed into a 5 mL tube and mixed with 4 mL 0.9% sodium  
121 chloride buffered at pH 5.0 with 1.95 g 2-(*N*-morpholino)ethanesulfonic acid (MES) per liter. Tubes  
122 were shaken at 300 rpm for 90 min, sonicated twice for 30 seconds and shaken for another 30 min. For

123 the pilot experiments, two times 50  $\mu\text{L}$  of  $10^0$ ,  $10^{-1}$ ,  $10^{-2}$ ,  $10^{-3}$ ,  $10^{-4}$  and  $10^{-5}$  dilutions were spread on  
124 water-yeast agar pH 5.0 with cycloheximide (containing 1 g sodium chloride, 0.1 g yeast extract, 1.95  
125 g MES, 20 g agar and 100 mg cycloheximide per liter). Previous experiments identified this low-  
126 nutrient, low-pH medium as the most suitable medium for the isolation of bacteria from decaying  
127 wood (Valášková *et al* 2009). Plates were incubated at 20 °C and bacterial colonies were counted after  
128 5 weeks of growth. A maximum of 24 colonies per wood sample were randomly collected for  
129 identification by 16S rDNA sequencing. For the main experiment, two times 50  $\mu\text{L}$  of  $10^{-2}$ ,  $10^{-3}$ ,  $10^{-4}$ ,  
130  $10^{-5}$  and  $10^{-6}$  dilutions were spread on water-yeast agar pH 5.0 with cycloheximide, thiabendazole and  
131 methanol (containing 1 g sodium chloride, 0.1 g yeast extract, 1.95 g MES, 20 g agar, 100 mg  
132 cycloheximide, 11 mg thiabendazole and 1 g methanol per liter). Methanol was included, because in  
133 the pilot experiments, diminished growth was observed for *Methylovirgula* isolates in the absence of  
134 methanol. The applied concentration of methanol is unlikely to be lethal for the majority of bacteria  
135 (Wadhvani *et al* 2008). A combination of cycloheximide and thiabendazole appeared to be more  
136 effective to inhibit fungal growth than cycloheximide alone (Hol *et al* 2015). Plates were incubated at  
137 20 °C and bacterial colonies were counted after 10 days, 3 weeks and 6 weeks. At each time point, a  
138 maximum of 24 colonies per wood sample were collected for further identification.

139 Bacteria were identified by 16S rDNA sequencing. Colony PCR was performed with primers  
140 27f (5'-GAGTTTGATCMTGGCTCAG-3') and 1492r (5'-GRTACCTTGTTACGACTT-3'; Lane,  
141 1991). The PCR mixture contained 0.04 U FastStart Taq DNA polymerase, 1 $\times$  buffer (Roche  
142 Diagnostics, Mannheim, Germany), 0.6  $\mu\text{M}$  of each primer and 200  $\mu\text{M}$  of each deoxynucleoside  
143 triphosphate in a total volume of 25  $\mu\text{L}$ . The PCR cycling regime was (1) one cycle of 5 min at 94°C,  
144 (2) 35 cycles of 1 min at 94°C, 1 min at 55°C, and 1.5 min at 72°C, and (3) one final extension cycle  
145 of 10 min at 72°C. PCR products were verified by agarose gel electrophoresis. Fragments were  
146 sequenced (Macrogen, Seoul, Korea) from both directions in the pilot experiment and with primer  
147 1492r in the main experiment.

148 Low quality regions of 16S rDNA sequences were trimmed and DNA fragments that were  
149 sequenced from both sides were assembled (DNA Baser Sequence Assembler; [www.dnabaser.com](http://www.dnabaser.com)).

150 Sequences were identified using the EzTaxon server (<http://www.ezbiocloud.net/eztaxon>; Kim et al  
151 2012) and classified into a taxonomic group with RDP Classifier (version 2.10, training set 14; Wang  
152 et al 2007). Trimmed and assembled sequences were deposited in GenBank under accession numbers  
153 KY907704-KY908306. The relative abundance of taxa was calculated, including only randomly  
154 picked colonies and taking into account the relative abundance at each time point as derived from  
155 colony counts. Bacterial communities from the same wood samples have been previously identified  
156 with pyrosequencing (Kielak *et al* 2016). Abundance of bacterial taxa as derived from sequenced  
157 isolates was plotted against the relative abundance in the pyrosequencing data for comparison. This  
158 was done at class as well as genus level.

159 For a comparative analysis, sequences from two previously published studies were recovered  
160 from GenBank (Folman *et al* 2008, Valášková *et al* 2009) and reclassified with RDP Classifier version  
161 2.10 and training set 14. Presence of bacterial taxa was compared between the two published studies  
162 and the present work.

163

#### 164 **Physicochemical characteristics**

165 Wood density was determined by water displacement of wood blocks (Olesen 1971). Moisture content  
166 was determined by drying wood dust at 60 °C for 4 days. Dried wood was grinded with liquid nitrogen  
167 and carbon and nitrogen content were measured on a Flash EA1112 CN analyzer (Interscience, Breda,  
168 the Netherlands).

169 Water extracts of saw dust were prepared by shaking 0.3 g of fresh saw dust with 6 mL milli-  
170 Q water at 300 rpm for 1 hour. Water extracts were used to determine pH, manganese peroxidase,  
171 laccase and cellulase activities as previously described (Valášková *et al* 2009). Ergosterol content was  
172 determined as an indication for fungal biomass with alkaline extraction and HPLC analysis (Baath  
173 2001; de Ridder-Duine *et al* 2006).

174 A correlation matrix was produced for all wood physicochemical parameters (density,  
175 moisture content, pH, C/N ratio), fungal biomass (ergosterol content), enzyme activities (Mn  
176 peroxidase, laccase, cellulase) and bacterial numbers (CFU per gram dry wood after 6 weeks).  
177 Correlations were calculated with Kendall's tau-b and Spearman's rho coefficients using SPSS  
178 version 23.0.

179

### 180 **Antibacterial activity screening**

181 A total of 635 isolates from decaying pine wood (main experiment) were screened for antibacterial  
182 activity. They were routinely grown in 24 well plates on water-yeast agar pH5 with 1 g L<sup>-1</sup> methanol  
183 (WYA5m) at 20 °C. The bacteria were transferred to 1-well plates (Greiner Bio-One; www.gbo.com)  
184 containing 35 mL WYA5m with the use of a custom-made 24-pin tool. The plates were incubated at  
185 20 °C for 1, 2 and 5 weeks for the isolates collected after 10 days, 3 weeks and 6 weeks respectively.  
186 Antibacterial activity was tested against four bacterial strains, *Escherichia coli* WA123,  
187 *Staphylococcus aureus* 533R4, *Dyella* strain WH32 and *Burkholderia* strain 4-A6. *E. coli* and *S.*  
188 *aureus* are clinically relevant strains for the development of new antibiotics and the *Dyella* and  
189 *Burkholderia* strains are ecologically relevant, as they originate from decaying wood. *E. coli* and *S.*  
190 *aureus* were routinely grown at 37 °C in Luria broth (LB) and *Dyella* and *Burkholderia* at 25 °C in  
191 1/10 tryptic soy broth pH5 (TSA5, containing 3 g tryptic soy broth (Oxoid) and 1.95 g MES per liter).  
192 Bacteria were grown overnight and the optical density at 600 nm (OD<sub>600</sub>) was determined. Agar  
193 medium (LB or TSA5 with 15 gram agar per liter) at 50 °C was inoculated with the bacteria to a final  
194 OD<sub>600</sub> of 0.002, 0.002, 0.004 and 0.008 for *E. coli*, *S. aureus*, *Dyella* and *Burkholderia* respectively.  
195 Plates were overlaid with 15 mL and the occurrence of clear zones around the bacterial isolates was  
196 observed after one day of growth. Isolates that showed inhibition zones were streaked for purity and  
197 the overlay assay was repeated in order to verify the results of the screening.

198

### 199 **Antimicrobial activity of selected isolates**



200 Thirty-six isolates were selected for a more in-depth characterization of antimicrobial properties  
201 (Suppl. Table 1). The selection was based on two criteria, (1) the isolates originated from pine samples  
202 colonized by *Stereum sanguinolentum* or *Mycena galericulata* (Kielak *et al* 2016), and (2) the isolates  
203 belonged to bacterial groups that are commonly isolated from decaying wood. Fungal strains *S.*  
204 *sanguinolentum* CBS 927.72 and *M. galericulata* CBS 623.88 were obtained from CBS-KNAW  
205 Collections ([www.cbs.knaw.nl](http://www.cbs.knaw.nl)). Fungi were pre-grown on malt-extract agar (MEA, containing 20 g  
206 malt extract (Oxoid) and 12 g agar per liter). Inhibition experiments were performed on two types of  
207 agar medium, WYA5m and MEA. Methanol was also added to MEA for all *Methylovirgula* strains.  
208 Bacteria were inoculated onto the plates and incubated at 20 °C for 3 weeks for the *Methylovirgula*  
209 strains, and for 1 week for the other strains. In order to detect the production of antifungal compounds,  
210 agar plugs from *S. sanguinolentum* or *M. galericulata* cultures were inoculated in the middle of the  
211 plate at a distance of 2 cm from the pre-inoculated bacterial colonies. Plates were further incubated at  
212 20 °C and inhibition zones or delayed fungal growth was observed during two months. For the  
213 detection of antibacterial compounds, bacteria were grown on WYA5m and MAE and overlay assays  
214 with *E. coli* WA123, *S. aureus* 533R4, *Dyella* WH32 and *Burkholderia* 4-A6 were performed as  
215 described above. Three replicates were prepared in all experiments, and delayed or inhibited fungal  
216 growth should be observed in all replicates.

217

218

## 219 Results

220

221 In order to get an overview of the abundance and identity of bacteria that can be isolated from  
222 decaying wood, different sources of wood were used: 1) birch wood with either *Piptoporus betulinus*,  
223 *Fomes fomentarius*, *Stereum subtomentosum* or *Plicaturopsis crispa* fruiting bodies, 2) Abies fir and  
224 pine wood with clear visual indications of brown-rotting patterns, and 3) oak stumps several years

225 after cutting. The number of bacteria varied between 0 and  $1 \times 10^8$  CFU per gram dry wood, with  
226 extremely low numbers in the birch wood samples (Figure 1a, Suppl. Table 2). The detection limit for  
227 the birch wood samples was about 200 CFU per gram dry wood. Low bacterial abundance in  
228 *Piptoporus* and *Fomes* colonized birch wood was confirmed on several independent sampling  
229 occasions (data not shown). Bacteria from *Abies*, pine and oak were isolated and identified by nearly  
230 complete 16S rDNA sequences (Suppl. Table 3). An average of 54% of randomly picked isolates had  
231 less than 97% sequence identity to known bacterial species, indicating that they were potentially new  
232 species. Growth of the *Methylovirgula* and *Beijerinckia* isolates slowed down after transfer to fresh  
233 agar plates without methanol and resumed after the addition of  $1 \text{ g L}^{-1}$  methanol to the growth  
234 medium.

235 Bacterial communities were subsequently characterized in pine wood samples in different  
236 stages of decay. The number of bacteria, as determined by the number of CFU per gram dry weight,  
237 increased with decreasing wood density, which is an indicator for wood decay stage (Figure 1b, Table  
238 1). Apart from density, wood moisture content and C/N ratio were also highly correlated with bacterial  
239 numbers (Suppl. Table 4). This was expected, because moisture increases, while C/N ratio decreases  
240 during decay. Moisture was used as a proxy for decay stage in a comparison of bacterial abundance in  
241 the experiments in this publication and the data of Valaskova et al (2009) (Figure 2). Other parameters  
242 that were measured, i.e. pH, ergosterol, manganese peroxidase, laccase and cellulose activity, did not  
243 correlate with the number of bacteria (Suppl. Table 4).

244 Partial 16S rRNA sequences were determined for a maximum of 24 isolates per sample per  
245 time point. A complete list of identified bacteria is presented in Suppl. Table 5. Relative abundances  
246 of bacterial taxa were calculated for 14 of the 20 samples (Figure 3, Suppl. Table 6). For the other six  
247 samples, Pi01, Pi02, Pi03, Pi07, Pi10 and Pi15, only 0-3 sequences per sample were obtained. They  
248 were therefore excluded from the community analysis. Three genera were significantly correlated with  
249 density, namely *Streptacidiphilus*, *Mycobacterium* and *Rhodanobacter* (Kendall's tau-b:  $P=0.006$ ,  
250  $0.006$  and  $0.009$  respectively). All three were exclusively found in more decayed wood samples with a  
251 density lower than  $0.3 \text{ g (cm}^3\text{)}^{-1}$ . The identity of isolated strains matched well with previously

252 published pyrosequencing data on the same wood samples (Kielak et al 2016). We obtained  
253 representative isolates for all taxa (until genus level) with an abundance of more than 2% in the  
254 pyrosequencing data (Figure 4).

255 In order to identify those bacterial taxa that are most common in naturally decaying wood, we  
256 made a comparison between bacteria isolated in the current experiments and two published studies  
257 (Table 2). In the published work, bacteria were isolated from decaying wood of various tree species  
258 with the white-rot fungi *Hypholoma fascicularum* and *Resinicium bicolor* (Folman et al, 2008,  
259 Valaskova et al, 2009). Within the Alphaproteobacteria, members of the family *Acetobacteraceae* and  
260 the genus *Sphingomonas* were commonly isolated from decaying wood. *Methylovirgula*, one of the  
261 dominant taxa in decaying wood, was found in all studies except by Valaskova et al. Furthermore,  
262 *Burkholderia* sp. from the Betaproteobacteria and *Xanthomonadaceae* from the Gammaproteobacteria  
263 were recovered in every experiment in the comparison. Acidobacteria from subdivision 1 also  
264 appeared to be commonly isolated from decaying wood, with *Granulicella* as the most abundant  
265 genus.

266 Less than 2% of the isolates showed antibacterial activity. These bacteria were identified as  
267 *Streptacidiphilus* (5), *Kitasatospora* (1), Microbacteriaceae (1) and *Acidisoma* (3). They were active  
268 against *S. aureus* 533R4, *Dyella* WH32 and/or *Burkholderia* 4-A6. Antibacterial activity was observed  
269 in three wood samples, Pi16, Pi17 and Pi19, all of which belonged to the more decayed wood samples  
270 (Table 3). A selection of 36 strains of frequently isolated taxa were tested for antibacterial and  
271 antifungal activity on two different media (Table 4). The *Methylovirgula* strains did not grow on MEA  
272 and were therefore tested on WYA5m only. As in the first screening, antibacterial activity was not  
273 observed on the poor water-yeast agar, while two strains showed slight inhibition of *E. coli* on the rich  
274 MEA medium. In contrast, antifungal activity was observed against *S. sanguinolentum* and *M.*  
275 *galericulata* for several Xanthomonadaceae and *Burkholderia* strains. Three of the *Xanthomonadaceae*  
276 strains originally co-occurred with *S. sanguinolentum*, but had activity against both fungi. One  
277 *Mycobacterium* strain, isolated from late stage decay where it co-occurred with *M. galericulata*  
278 showed activity against *M. galericulata*, but not against *S. sanguinolentum* (Table 4). For

279 *Burkholderia*, antifungal activity was more frequently directed against not co-occurring fungi than  
280 against co-occurring fungi.

281

282

## 283 Discussion

284

285 Antagonistic interactions among wood decaying fungi have been extensively studied, but little is  
286 known about the interactions with other wood inhabiting microorganisms (Johnston *et al* 2016). We  
287 know that wood decaying fungi heavily compete for substrates and a wide range of antimicrobial  
288 compounds have been identified (Hiscox *et al* 2015). These fungal compounds can inhibit fungi as  
289 well as bacteria (Bérdy 2005). Toxic fungal compounds could potentially be an explanation for the  
290 extremely low abundance of bacteria in decaying birch wood. Though low bacterial numbers were  
291 observed for four different wood decay fungi, including white and brown-rot fungi from three different  
292 orders (*Polyporales*, *Russulales* and *Agricales*), high numbers have also been observed for birch wood  
293 colonized by *Hypholoma fasciculare* (Valášková *et al* 2009). Therefore, we can conclude that the  
294 abundance of bacteria in decaying birch wood is influenced by fungal species. Another pattern was  
295 observed for decaying pine wood. We showed that bacterial abundance was correlated with wood  
296 density, which is an indicator for the stage of wood decay. Later stages of decay were apparently more  
297 favorable for bacteria than earlier stages, which might be related to the higher moisture and nitrogen  
298 content. However, there is one exception in this range. Sample Pi15 was highly decayed, while  
299 bacterial numbers were around the limit of detection. This sample was dominated by one fungal  
300 species, 99.7% *Ischnoderma benzoinum*. To conclude, the general pattern is that bacterial abundance  
301 increases during wood decay. In addition, we identified several wood decaying fungi that successfully  
302 excluded other fungi and bacteria. These were *Piptoporus betulinus*, *Fomes fomentarius*, *Stereum*  
303 *subtomentosum*, *Plicaturopsis crispa* and *Ischnoderma benzoinum*.

304 In order to investigate antagonistic activity of bacteria from decaying wood against fungi and  
305 other bacteria, we established a culture collection of bacteria from decaying wood. One of the major  
306 problems when working with isolated bacteria is that they are often not representative for the original  
307 community. In most habitats, only a few percent of the bacteria is culturable and many taxa are not  
308 captured in isolation attempts (Rappe and Giovannoni 2003). Valášková et al (2009) previously  
309 demonstrated that it is relatively easy to culture bacteria from decaying wood, even for groups that are  
310 generally considered as hard-to-culture like the *Acidobacteria* (Jones et al 2009). In agreement, we  
311 found a good match between the identity of isolated bacteria and pyrosequencing data of the same  
312 wood samples (Kielak *et al* 2016). Though *Acidobacteria* were underrepresented in the culture  
313 collection, we obtained representative isolates for all taxa (until genus level) with an abundance of  
314 more than 2% in the pyrosequencing data. In addition, many potentially new bacterial species were  
315 isolated. Several new groups within the genus *Methylovirgula* were also captured. It is likely that these  
316 groups were previously missed, because of the absence of methanol in the isolation medium. By  
317 comparing our data with previously published studies reporting on isolated bacteria from decaying  
318 wood, we were able to identify several taxa that are ‘typical’ for this environment. These were  
319 *Xanthomonadaceae*, *Acetobacteraceae*, *Caulobacteraceae*, *Methylovirgula*, *Sphingomonas*,  
320 *Burkholderia* and *Granulicella*. Our current collection is highly representative for bacterial  
321 communities in decaying wood.

322 The complete collection of bacteria from decaying pine wood was screened for antagonistic  
323 activity against four different bacteria, but surprisingly few bacteria produced antagonistic compounds  
324 against other bacteria. Low bacterial abundance could be an explanation for low antibacterial activity,  
325 because bacteria are less likely to encounter each other at low abundance. Indeed, all bacteria that  
326 exhibited antibacterial activity were isolated from the more decayed wood samples with higher  
327 bacterial abundance. However, even in those samples, antibacterial activity was not very common.  
328 Screening for antibacterial activity was performed on a low nutrient agar, water-yeast agar pH5 with  
329 methanol. We choose this medium, because many isolates are not able to grow at higher nutrient  
330 concentrations or pH. It is likely that the medium composition influenced the production of

331 antimicrobial compounds. Higher nutrient concentrations did not increase the frequency of bacteria  
332 expressing antibacterial compounds in a pilot experiment (data not shown), though a slight increase  
333 was observed when a subset of the isolates from pine wood were tested on MEA medium (Table 4).  
334 Apparently, bacterial competition via the production of antibacterial compounds is not an important  
335 trait for bacteria in wood decay.

336         We originally hypothesized that bacteria would not attack the wood decaying fungi, because  
337 they are thought to be nutritionally dependent on the fungi. However, in contrast to observations by  
338 Valášková et al (2009), several isolates from decaying wood showed antagonistic activity against  
339 wood decaying fungi. *Xanthomonadaceae* isolated from wood colonized by the early successional  
340 fungus *S. sanguinolentum* were antagonistic against *S. sanguinolentum* as well as the late successional  
341 fungus *M. galericulata*. For *Burkholderia*, the isolates from *S. sanguinolentum* colonized wood were  
342 pre-dominantly active against *M. galericulata* and *vice versa*. So, no general pattern could be observed  
343 related to decay stage or co-occurrence, but antifungal activity was definitely higher than antibacterial  
344 activity. Close associations between soil *Burkholderia* and fungi have been reported with antagonistic  
345 as well as mutualistic interactions (Stopnisek 2016). Members of the genera *Burkholderia* and *Dyella*  
346 (*Xanthomonadaceae*) have both been identified as mycophagous, *i.e.* fungal feeding bacteria (Rudnik  
347 et al 2015; Ballhausen et al 2015) and are able to migrate along fungal hyphae (Warmink and van  
348 Elsas 2009). The picture arises of bacteria that are consuming fungal hyphae and/or fungal exudates,  
349 while at the same time using the hyphae to explore new territories. Assuming that the bacteria are not  
350 able to totally eliminate the wood decaying fungi, this is likely to be an efficient strategy. Feeding on  
351 fungi has also been indicated as an important nutritional strategy of bacteria inhabiting decomposing  
352 leaf litter (Tláskal *et al.*, 2016).

353         In conclusion, bacterial abundance in decaying wood increases with progressive wood decay,  
354 but can be drastically diminished when wood is colonized by some specific fungi. Contrary to our  
355 original hypothesis, bacteria isolated from decaying wood hardly exhibited antagonistic activity  
356 against bacteria, while several isolates did show antagonistic activity against wood decaying fungi.

357

358

## 359 Funding

360

361 This work was supported by the BE-Basic foundation, The Netherlands.

362

363

## 364 Acknowledgements

365

366 We thank Maria Hundscheid for technical assistance. Natuurmonumenten kindly provided  
367 access to the field site and gave permission to take samples. This is a NIOO publication no. xxxx.

368

369

## 370 References

371

372 Baath E. Estimation of fungal growth rates in soil using C-14-acetate incorporation into ergosterol.

373 *Soil Biol Biochem* 2001;**33**:2011-18.

374 Ballhausen MB, van Veen JA, Hundscheid MPJ, de Boer W. Methods for baiting and enriching

375 fungus-feeding (mycophagous) rhizosphere bacteria. *Front Microbiol* 2015;**6**:1416.

376 Barros L, Ventuizini BA, Baptista P *et al.* Chemical composition and biological properties of

377 Portuguese wild mushrooms: A comprehensive study. *J Agric Food Chem* 2008;**56**:3856-62.

- 378 Bérdy J. Bioactive microbial metabolites. *J Antibiotics* 2005;**58**:1-26.
- 379 Blanchette RA, Shaw CG. Associations among bacteria, yeasts, and basidiomycetes during wood  
380 decay. *Phytopathology* 1978;**68**:631-37.
- 381 Boddy L. Interspecific combative interactions between wood-decaying basidiomycetes. *FEMS*  
382 *Microbiol Ecol* 2000;**31**:185-94.
- 383 de Boer W, van der Wal A. Interactions between saprotrophic basidiomycetes and bacteria. In: Boddy  
384 L, Frankland JC, van West P (eds). *Ecology of Saprotrophic Basidiomycetes*. Amsterdam:  
385 Elsevier, 2008, 143-53.
- 386 de Boer W, Folman LB, Klein Gunnewiek, PJA *et al*. Mechanism of antibacterial activity of the white-  
387 rot fungus *Hypholoma fasciculare* colonizing wood. *Can J Microbiol* 2010;**56**:380-88.
- 388 de Ridder-Duine AS, Kowalchuk GA, Gunnewiek P *et al*. Evaluation of a simple, non-alkaline  
389 extraction protocol to quantify soil ergosterol. *Pedobiologica* 2006;**50**:293-300.
- 390 Dashtban M, Schraft H, Syed TA, Qin W. Fungal biodegradation and enzymatic modification of  
391 lignin. *Int J Biochem Mol Biol* 2010;**1**:36-50.
- 392 Folman LB, Klein Gunnewiek PJA, Boddy L, de Boer W. Impact of white-rot fungi on numbers and  
393 community composition of bacteria colonizing beech wood from forest soil. *FEMS Microbiol*  
394 *Ecol* 2008;**63**:181-91.
- 395 Hervé V, Le Roux X, Uroz S *et al*. Diversity and structure of bacterial communities associated with  
396 *Phanerochaete chrysosporium* during wood decay. *Environ Microbiol* 2014;**16**:2238-52.
- 397 Hiscox J, O'Leary J, Boddy L. Fungal wars: basidiomycete battles in wood decay. *Stud Mycol*  
398 2018;**89**:117-124.
- 399 Hiscox J, Savoury M, Vaughan IP *et al*. Antagonistic fungal interactions influence carbon dioxide  
400 evolution from decomposing wood. *Fungal Ecol* 2015;**14**:24-32.



- 401 Hol G, Garbeva P, Hordijk C *et al.* Non-random species loss in bacterial communities reduces  
402 antifungal volatile production. *Ecology* 2015;**96**:2042-48.
- 403 Hoppe B, Kahl T, Karasch P *et al.* Network analysis reveals ecological links between N-fixing  
404 bacteria and wood-decaying fungi. *PLoS One* 2014;**9**:e88141.
- 405 Hoppe B, Krüger D, Kahl T *et al.* A pyrosequencing insight into sprawling bacterial diversity and  
406 community dynamics in decaying deadwood logs of *Fagus sylvatica* and *Picea abies*. *Sci Rep*  
407 2015;**5**:9456.
- 408 Johnston SR, Boddy L, Weightman AJ. Bacteria in decomposing wood and their interactions with  
409 wood-decay fungi. *FEMS Microbiol Ecol* 2016, DOI: 10.1093/femsec/fiw179.
- 410 Jones RT, Robeson MS, Lauber CL *et al.* A comprehensive survey of soil acidobacterial diversity  
411 using pyrosequencing and clone library analyses. *ISME J* 2009;**3**:442-53.
- 412 Kamei I, Yoshida T, Enami D, Meguro S. Coexisting *Curtobacterium* bacterium promotes growth of  
413 white-rot fungus *Stereum* sp. *Curr Microbiol* 2012;**64**:173-78.
- 414 Klaassen RKWM. Bacterial decay in wooden foundation piles – patterns and causes: a study of  
415 historical pile foundations in the Netherlands. *Int. Biodeter Biodegradation* 2008;**61**:45-60
- 416 Kielak AM, Scheublin TR, Mendes LW *et al.* Bacterial community succession in pine-wood  
417 decomposition. *Front Microbiol* 2016;**7**:231.
- 418 Kim OS, Cho YJ, Lee K *et al.* Introducing EzTaxon-e: a prokaryotic 16S rRNA gene sequence  
419 database with phylotypes that represent uncultured species. *Int J Syst Evol Microbiol*  
420 2012;**62**:716-21.
- 421 Murray AC, Woodward S. In vitro interactions between bacteria isolated from Sitka spruce stumps  
422 and *Heterobasidion annosum*. *For Path* 2003;**33**:53-67.
- 423 Olesen PO. The water displacement method. *For Tree Improv* 1971;**3**:3-23.

- 424 Probst M, Gómez-Brandón M, Bardelli M *et al* Bacterial communities of decaying Norway spruce  
425 follow distinct slope exposure and time-dependent trajectories. *Env Microbiol* 2018;  
426 doi:10.1111/1462-2920.14359
- 427 Rappé MS, Giovannoni SJ. The uncultured microbial majority. *Annu Rev Microbiol* 2003;**57**:369-94.
- 428 Rina-Kanto JM, Sinkko H, Rajala T *et al*. Natural decay process affects the abundance and community  
429 structure of bacteria and archaea in *Picea abies* logs. *FEMS Microbiol Ecol* 2016; **92**:403-10.
- 430 Rudnik MB, van Veen JA, de Boer W. Baiting of rhizosphere bacteria with hyphae of common soil  
431 fungi reveals a diverse group of potentially mycophagous secondary consumers. *Soil Biol*  
432 *Biochem* 2015;**88**:73-82.
- 433 Schmidt O. *Wood and tree fungi. Biology, damage, protection, and use*. Heidelberg: Springer, 2006.
- 434 Stopnisek N, Zühlke D, Carlier A *et al*. Molecular mechanisms underlying the close association  
435 between soil *Burkholderia* and fungi. *ISME J* 2016;**10**:253-64.
- 436 Suay I, Arenal F, Asensio FJ *et al*. Screening of basidiomycetes for antimicrobial activities. *Antonie*  
437 *van Leeuwenhoek* 2000;**78**:129-39.
- 438 Tláškal T, Voříšková J, Baldrian P. Bacterial succession on decomposing leaf litter exhibits a specific  
439 occurrence pattern of cellulolytic taxa and decomposers of fungal mycelia. *FEMS Microbiol*  
440 *Ecol* 2016; 92:fiw177
- 441 Tláškal T, Zrůstová P, Vrška T, Baldrian P. Bacteria associated with decomposing dead wood in a  
442 natural temperate forest. *FEMS Microbiol Ecol* 2017; fix157
- 443 Valášková V, de Boer W, Klein Gunnewiek PJA *et al*. Phylogenetic composition and properties of  
444 bacteria coexisting with the fungus *Hypholoma fasciculare* in decaying wood. *ISME J*  
445 2009;**3**:1218-21.

- 446 van der Wal A, Geydan TD, Kuyper TW, de Boer W. A thready affair: linking fungal diversity and  
447 community dynamics to terrestrial decomposition processes. *FEMS Microbiol Rev*  
448 2013;**37**:477-94.
- 449 van der Wal A, Ottosson E, de Boer W. Neglected role of fungal community composition in  
450 explaining variation in wood decay rates. *Ecology* 2015;**96**:124-33.
- 451 Wadhvani T, Desai K, Patel D *et al.* Effect of various solvents on bacterial growth in context of  
452 determining MIC of various antimicrobials. *Internet J Microbiol* 2008;**7**:1.
- 453 Wang Q, Garrity GM, Tiedje JM, Cole JR. Naïve Bayesian Classifier for Rapid Assignment of rRNA  
454 Sequences into the New Bacterial Taxonomy. *Appl Environ Microbiol* 2007;**73**:5261-67.
- 455 Warmink JA, van Elsas JD. Migratory response of soil bacteria to *Lyophyllum* sp. Strain Karsten in  
456 soil microcosms. *Appl Environ Microbiol* 2009;**75**:2820-30.
- 457

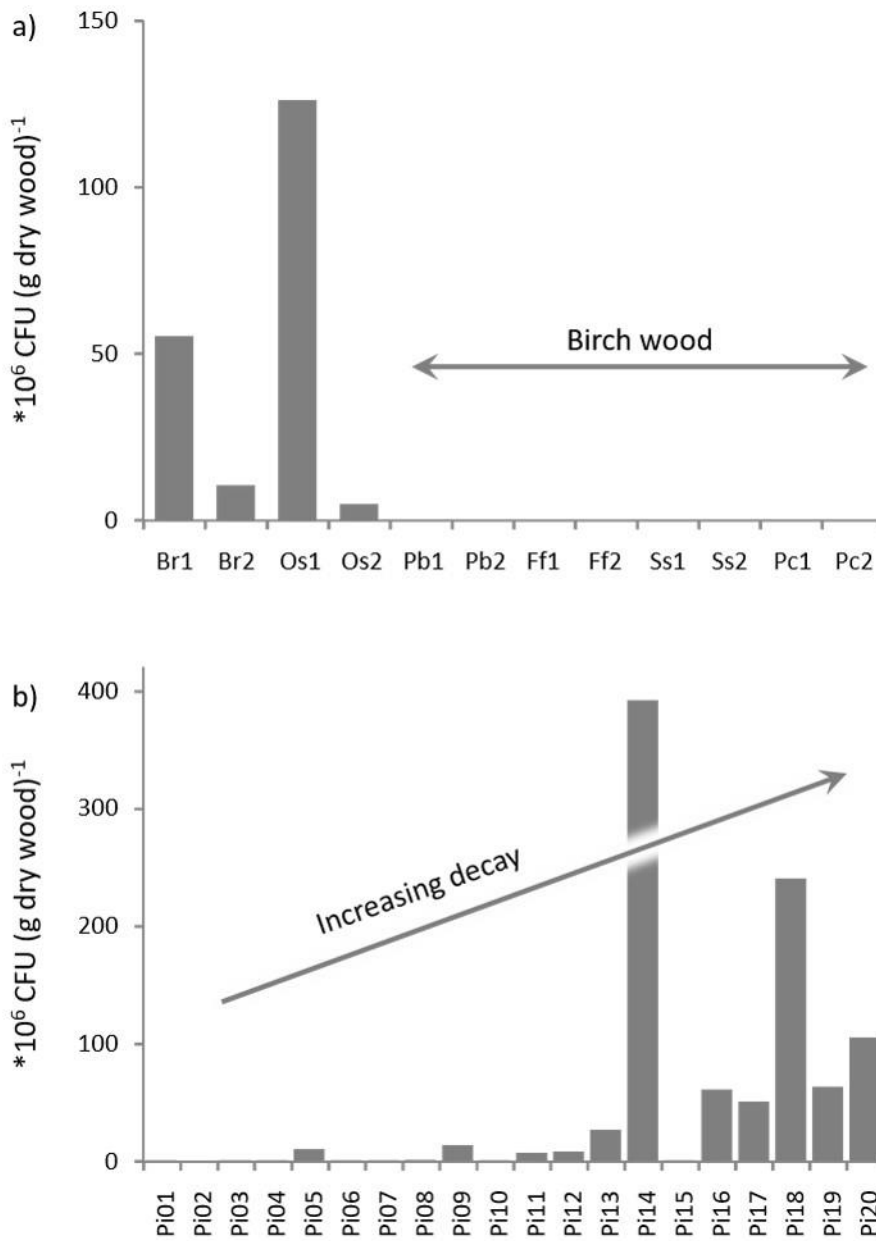

458

459 Figure 1: Number of colony forming units in decaying wood samples. a) Pilot experiment with  
460 decaying Abies (Br1), pine (Br2), oak (Os1, Os2) and birch wood (Pb1, Pb2, Ff1, Ff2, Ss1, Ss2, Pc1,  
461 Pc2). b) Main experiment with a decay range of pine wood. For a description of wood samples see  
462 Table 1 and Suppl. Table 2.

463

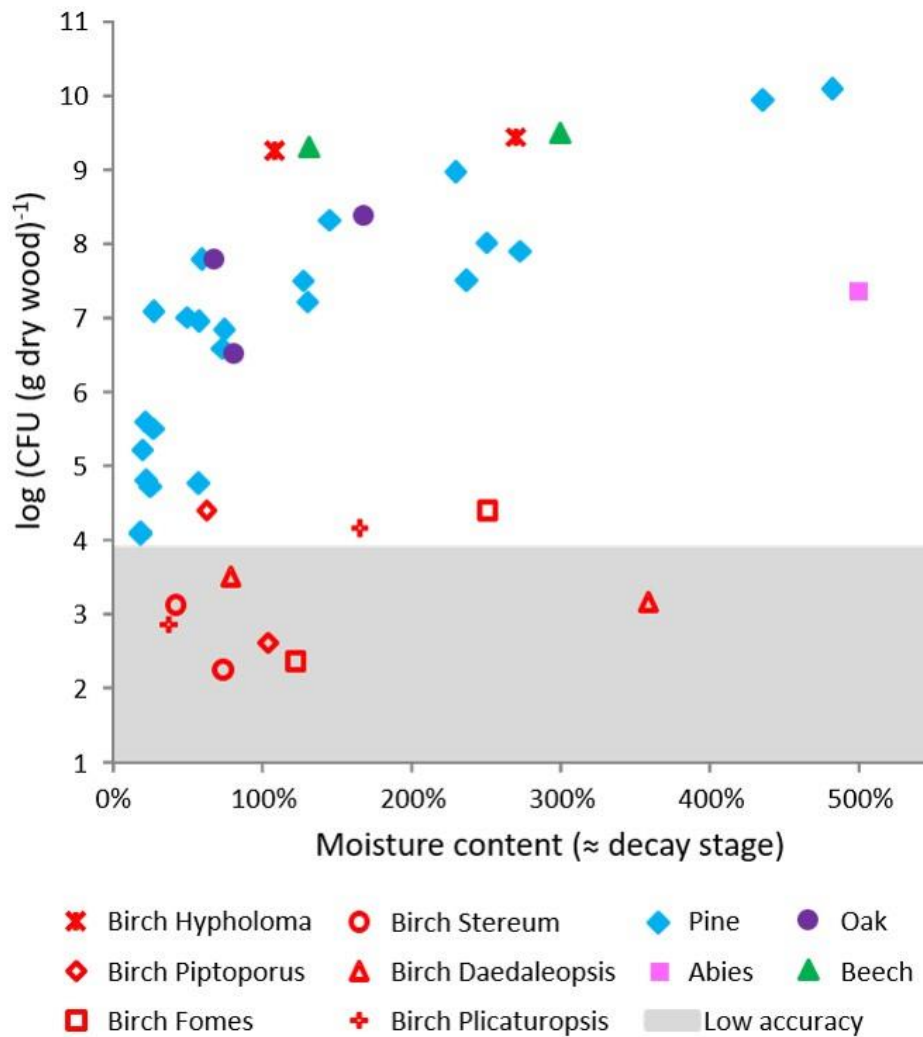

465 Figure 2: Number of colony forming units in decaying wood samples from the samples collected for  
466 this study and from Valášková *et al* (2009) combined. Moisture content serves as a proxy for decay  
467 stage, as density was not available for all samples. Measurements below  $10^4$  CFU (g dry weight)<sup>-1</sup>  
468 become less accurate due to the low number of colonies on plates, this area is indicated in grey.

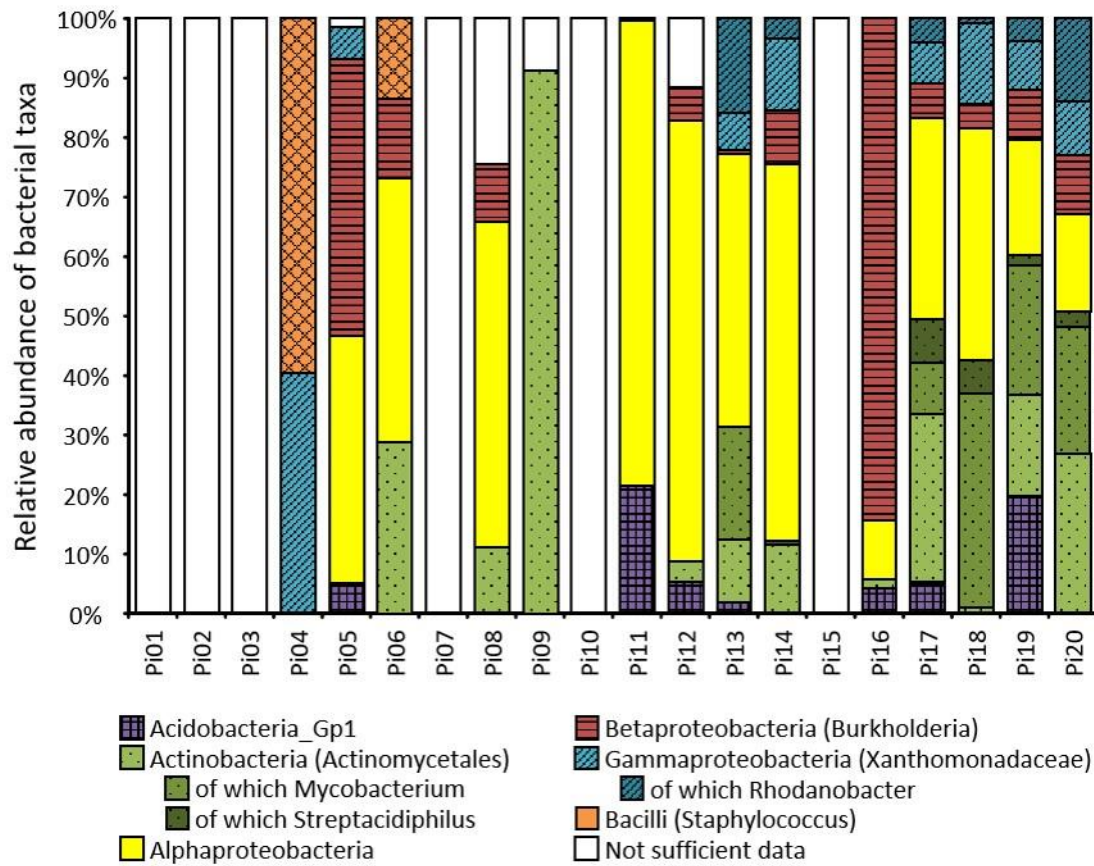

471 Figure 3: Bacterial community composition in decaying pine wood as determined by the identity of  
472 randomly picked isolates. For samples with very low bacterial abundance, we could not obtain  
473 sufficient data.

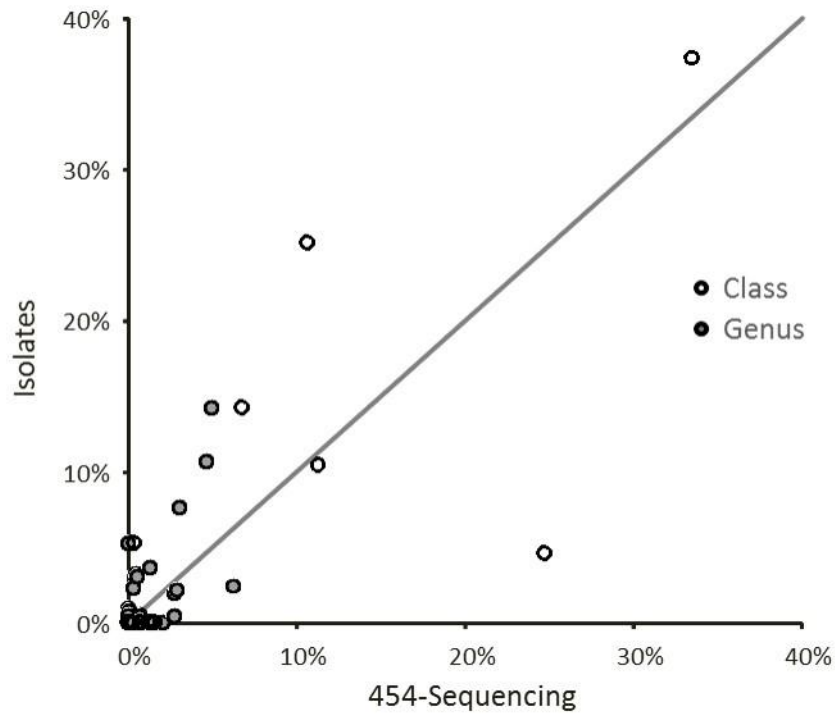

479 Table 1: Overview of wood parameters and number of bacteria.  
480

| Wood sample | pH  | Moisture (w/w) | Density (g (cm <sup>3</sup> ) <sup>-1</sup> ) | Nitrogen | Carbon | C/N  | Ergosterol (mg (kg dry wood) <sup>-1</sup> ) | CFU after 10 days (CFU (g dry wood) <sup>-1</sup> ) | CFU after 3 weeks (CFU (g dry wood) <sup>-1</sup> ) | CFU after 6 weeks (CFU (g dry wood) <sup>-1</sup> ) | Mn-peroxidase* | Laccase* | Cellulase* |
|-------------|-----|----------------|-----------------------------------------------|----------|--------|------|----------------------------------------------|-----------------------------------------------------|-----------------------------------------------------|-----------------------------------------------------|----------------|----------|------------|
| Pi01        | 5.1 | 22%            | 0.50                                          | 0.07%    | 49%    | 674  | 12                                           | 5.0E+04                                             | 6.3E+04                                             | 6.3E+04                                             | 185            | 27       | 0          |
| Pi02        | 4.0 | 19%            | 0.49                                          | 0.05%    | 47%    | 963  | 37                                           | 0.0E+00                                             | 0.0E+00                                             | 0.0E+00                                             | 15             | 0        | 0          |
| Pi03        | 4.3 | 19%            | 0.45                                          | 0.02%    | 51%    | 2384 | 1                                            | 1.2E+04                                             | 1.2E+04                                             | 1.2E+04                                             | 6              | 0        | 0          |
| Pi04        | 4.9 | 28%            | 0.42                                          | 0.05%    | 47%    | 911  | 14                                           | 2.6E+05                                             | 3.1E+05                                             | 3.1E+05                                             | 807            | 16       | 2          |
| Pi05        | 4.7 | 50%            | 0.42                                          | 0.03%    | 47%    | 1421 | 17                                           | 9.7E+06                                             | 9.9E+06                                             | 9.9E+06                                             | 57             | 0        | 0          |
| Pi06        | 4.1 | 21%            | 0.39                                          | 0.07%    | 48%    | 653  | 60                                           | 8.7E+04                                             | 1.6E+05                                             | 1.6E+05                                             | 22             | 0        | 3          |
| Pi07        | 3.7 | 25%            | 0.37                                          | 0.05%    | 48%    | 1028 | 55                                           | 3.9E+04                                             | 5.1E+04                                             | 5.1E+04                                             | 191            | 0        | 1          |
| Pi08        | 4.2 | 22%            | 0.37                                          | 0.07%    | 47%    | 653  | 29                                           | 8.9E+04                                             | 3.9E+05                                             | 5.2E+05                                             | 80             | 1        | 12         |
| Pi09        | 4.0 | 28%            | 0.36                                          | 0.06%    | 47%    | 756  | 62                                           | 1.1E+07                                             | 1.2E+07                                             | 1.3E+07                                             | 7              | 0        | 1          |
| Pi10        | 4.2 | 25%            | 0.35                                          | 0.06%    | 47%    | 734  | 28                                           | 5.1E+04                                             | 5.1E+04                                             | 6.4E+04                                             | 895            | 0        | 19         |
| Pi11        | 3.7 | 74%            | 0.34                                          | 0.07%    | 48%    | 678  | 49                                           | 5.3E+05                                             | 3.8E+06                                             | 6.5E+06                                             | 108            | 1        | 2          |
| Pi12        | 3.8 | 76%            | 0.32                                          | 0.07%    | 47%    | 665  | 28                                           | 7.4E+05                                             | 7.0E+06                                             | 7.9E+06                                             | 49             | 0        | 16         |
| Pi13        | 4.0 | 131%           | 0.28                                          | 0.11%    | 48%    | 431  | 28                                           | 4.1E+06                                             | 1.6E+07                                             | 2.6E+07                                             | 101            | 0        | 0          |
| Pi14        | 4.0 | 146%           | 0.23                                          | 0.22%    | 52%    | 243  | 44                                           | 4.6E+07                                             | 2.0E+08                                             | 3.9E+08                                             | 17             | 0        | 0          |
| Pi15        | 3.7 | 58%            | 0.22                                          | 0.02%    | 46%    | 2143 | 51                                           | 5.7E+04                                             | 5.7E+04                                             | 5.7E+04                                             | 5              | 0        | 5          |
| Pi16        | 3.9 | 60%            | 0.19                                          | 0.10%    | 47%    | 481  | 57                                           | 5.1E+07                                             | 6.1E+07                                             | 6.1E+07                                             | 55             | 0        | 2          |
| Pi17        | 4.4 | 128%           | 0.19                                          | 0.44%    | 48%    | 108  | 207                                          | 6.6E+06                                             | 3.1E+07                                             | 5.0E+07                                             | 314            | 0        | 2          |
| Pi18        | 4.6 | 251%           | 0.18                                          | 0.19%    | 44%    | 230  | 13                                           | 8.7E+07                                             | 1.0E+08                                             | 2.4E+08                                             | 48             | 0        | 0          |
| Pi19        | 4.8 | 237%           | 0.15                                          | 0.41%    | 50%    | 125  | 57                                           | 1.0E+07                                             | 3.2E+07                                             | 6.3E+07                                             | 25             | 0        | 0          |
| Pi20        | 3.9 | 274%           | 0.12                                          | 0.66%    | 50%    | 75   | 37                                           | 4.7E+07                                             | 7.7E+07                                             | 1.0E+08                                             | 76             | 0        | 0          |

\* Mn-peroxidase, laccase and cellulase activity in mmol DMAB-MBTH (g dry wood)<sup>-1</sup> h<sup>-1</sup>, μmol ABTS · (g dry wood)<sup>-1</sup> h<sup>-1</sup> and μmol RBB (g dry wood)<sup>-1</sup> h<sup>-1</sup> respectively.

481  
482  
483  
484  
485  
486  
487  
488

Table 2: Comparison of bacterial taxa that were isolated from decaying wood in different experiments, the pilot and main experiment of this study, the experiment by Valášková et al (2009) and by Folman et al (2008). Strains that could not be identified at the family level were excluded, except for Acidobacteria. Taxa with only one or two representatives over all five experiments were also excluded.

| Phylum                 | Family                         | Genus             | Pine | Pilot | Valaskova et al | Folman et al |
|------------------------|--------------------------------|-------------------|------|-------|-----------------|--------------|
| Acidobacteria (Gp1)    |                                |                   | 5%   | 9%    | +               | +            |
|                        |                                | Acidicapsa        | 0.5% |       | +               | +            |
|                        |                                | Granulicella      | 2%   | 5%    | +               | +            |
| Actinobacteria         | Acidimicrobinae_incertae_sedis | Aciditerrimonas   |      | 7%    |                 |              |
|                        | Actinospicaceae                | Actinospica       | 0.3% | 9%    |                 |              |
|                        | Conexibacteraceae              | Conexibacter      |      | 18%   |                 |              |
|                        | Microbacteriaceae              |                   | 14%  | 2%    |                 |              |
|                        | Microbacteriaceae              | Fronthabitans     | 6%   |       |                 |              |
|                        | Microbacteriaceae              | Gryllotalpicola   | 2%   | 2%    |                 |              |
|                        | Mycobacteriaceae               | Mycobacterium     | 8%   | 4%    |                 |              |
|                        | Streptomycetaceae              | Streptacidiphilus | 0.7% | <2%   |                 |              |
| Firmicutes             | Staphylococcaceae              | Staphylococcus    | 5%   |       |                 | +            |
| Proteobacteria (Alpha) | Acetobacteraceae               |                   | 13%  | 12%   | +               | +            |
|                        | Acetobacteraceae               | Acidisoma         | 2%   | 2%    |                 | +            |
|                        | Acetobacteraceae               | Acidisphaera      | 0.3% | 2%    | +               |              |
|                        | Beijerinckiaceae               |                   | 16%  | 9%    |                 | +            |
|                        | Beijerinckiaceae               | Beijerinckia      | 0.8% | 2%    |                 | +            |
|                        | Beijerinckiaceae               | Methylovirgula    | 11%  | 7%    |                 | +            |
|                        | Bradyrhizobiaceae              | Bradyrhizobium    | 2%   | 4%    |                 | +            |
|                        | Methylocystaceae               | Methylosinus      | 2%   |       |                 |              |
|                        | Caulobacteraceae               |                   | 2%   | 2%    | +               | +            |
|                        | Caulobacteraceae               | Phenylobacterium  | 2%   |       |                 |              |
| Sphingomonadaceae      | Sphingomonas                   | 3%                | 4%   | +     | +               |              |
| Proteobacteria (Beta)  | Burkholderiaceae               | Burkholderia      | 14%  | 11%   | +               | +            |
| Proteobacteria (Gamma) | Xanthomonadaceae               |                   | 10%  | 4%    | +               | +            |
|                        | Xanthomonadaceae               | Dyella            | 4%   | <2%   | +               |              |
|                        | Xanthomonadaceae               | Rhodanobacter     | 3%   | 4%    |                 |              |

489



490 Table 3: Isolates with antibacterial activity.

| Wood sample | Isolate | Selection  | Taxon             | Antibacterial activity against |
|-------------|---------|------------|-------------------|--------------------------------|
| Pi16        | P26-C5  | random     | Microbacteriaceae | Dyella                         |
| Pi16        | P26-B6  | random     | Acidisoma         | Dyella, Burkholderia           |
| Pi16        | P26-C2  | random     | Acidisoma         | Dyella, Burkholderia           |
| Pi16        | P26-B4  | random     | Acidisoma         | Dyella, Burkholderia           |
| Pi17        | P43-C6  | random     | Kitasatospora     | Staphylococcus, Dyella         |
| Pi17        | P03-D6  | random     | Streptacidiphilus | Staphylococcus                 |
| Pi17        | P43-C3  | random     | Streptacidiphilus | Staphylococcus, Dyella         |
| Pi17        | P43-D4  | random     | Streptacidiphilus | Staphylococcus, Dyella         |
| Pi17        | P03-A5  | morphology | Streptacidiphilus | Staphylococcus, Dyella         |
| Pi19        | P43-B6  | random     | ??                | Staphylococcus                 |
| Pi19        | P02-A3  | morphology | Streptacidiphilus | Dyella                         |

\* No sequence could be obtained for this isolate.

491

492 Table 4: Antifungal and antibacterial activity of bacteria from decaying wood. Green and blue indicate  
 493 bacteria that originally co-occurred with *S. sanguinolentum* and *M. galericulata* respectively. ++,  
 494 inhibited fungal growth; +, delayed fungal growth; -, no effect on fungal growth.

| Isolate | Taxon                           | <i>S. sanguinolentum</i><br>CBS 927.72 |     | <i>M. galericulata</i><br>CBS 623.88 |     | Dyella WH32 |     | Burkholderia 4-A6 |     | E. coli WA321 |     | S. aureus 533R4 |     |
|---------|---------------------------------|----------------------------------------|-----|--------------------------------------|-----|-------------|-----|-------------------|-----|---------------|-----|-----------------|-----|
|         |                                 | WYA5m                                  | MEA | WYA5m                                | MEA | WYA5m       | MEA | WYA5m             | MEA | WYA5m         | MEA | WYA5m           | MEA |
| P04-D5  | Xanthomonadaceae-Luteibacter    | +                                      | -   | -                                    | -   | -           | -   | -                 | -   | -             | -   | -               | -   |
| P20-A1  | Xanthomonadaceae                | ++                                     | ++  | ++                                   | ++  | -           | -   | -                 | -   | -             | -   | -               | -   |
| P20-B1  | Xanthomonadaceae                | ++                                     | ++  | ++                                   | ++  | -           | -   | -                 | -   | -             | -   | -               | -   |
| P41-A4  | Xanthomonadaceae                | ++                                     | ++  | ++                                   | ++  | -           | -   | -                 | -   | -             | -   | -               | -   |
| P19-A5  | Burkholderia                    | -                                      | -   | -                                    | +   | -           | -   | -                 | -   | -             | -   | -               | -   |
| P19-A6  | Burkholderia                    | -                                      | -   | -                                    | +   | -           | -   | -                 | -   | -             | -   | -               | -   |
| P19-B5  | Burkholderia                    | -                                      | -   | -                                    | +   | -           | -   | -                 | -   | -             | -   | -               | -   |
| P19-D5  | Burkholderia                    | -                                      | +   | -                                    | -   | -           | -   | -                 | -   | -             | -   | -               | -   |
| P22-A2  | Beijerinckiaceae-Methylovirgula | -                                      | -   | -                                    | -   | -           | -   | -                 | -   | -             | -   | -               | -   |
| P22-B3  | Beijerinckiaceae-Methylovirgula | -                                      | -   | -                                    | -   | -           | -   | -                 | -   | -             | -   | -               | -   |
| P22-C5  | Beijerinckiaceae-Methylovirgula | -                                      | -   | -                                    | -   | -           | -   | -                 | -   | -             | -   | -               | -   |
| P22-D6  | Beijerinckiaceae-Methylovirgula | -                                      | -   | -                                    | -   | -           | -   | -                 | -   | -             | -   | -               | -   |
| P41-C4  | Acetobacteraceae                | -                                      | -   | -                                    | -   | -           | -   | -                 | -   | -             | -   | -               | -   |
| P10-A2  | Xanthomonadaceae                | -                                      | -   | -                                    | -   | -           | -   | -                 | -   | +             | -   | -               | -   |
| P10-C5  | Xanthomonadaceae-Dyella         | -                                      | -   | -                                    | -   | -           | -   | -                 | -   | -             | -   | -               | -   |
| P10-C6  | Xanthomonadaceae-Dyella         | -                                      | -   | -                                    | -   | -           | -   | -                 | -   | +             | -   | -               | -   |
| P09-B4  | Xanthomonadaceae-Rhodanobacter  | -                                      | -   | -                                    | -   | -           | -   | -                 | -   | -             | -   | -               | -   |
| P09-A5  | Xanthomonadaceae-Rhodanobacter  | -                                      | -   | -                                    | -   | -           | -   | -                 | -   | -             | -   | -               | -   |
| P10-C1  | Xanthomonadaceae-Rhodanobacter  | -                                      | -   | -                                    | -   | -           | -   | -                 | -   | -             | -   | -               | -   |
| P30-B5  | Xanthomonadaceae-Rhodanobacter  | -                                      | -   | -                                    | -   | -           | -   | -                 | -   | -             | -   | -               | -   |
| P30-C3  | Xanthomonadaceae-Rhodanobacter  | -                                      | -   | -                                    | -   | -           | -   | -                 | -   | -             | -   | -               | -   |
| P09-A1  | Burkholderia                    | -                                      | +   | -                                    | -   | -           | -   | -                 | -   | -             | -   | -               | -   |
| P09-D6  | Burkholderia                    | -                                      | +   | -                                    | -   | -           | -   | -                 | -   | -             | -   | -               | -   |
| P10-A1  | Burkholderia                    | -                                      | +   | -                                    | -   | -           | -   | -                 | -   | -             | -   | -               | -   |
| P10-B4  | Burkholderia                    | -                                      | +   | -                                    | -   | -           | -   | -                 | -   | -             | -   | -               | -   |
| P29-A4  | Beijerinckiaceae-Methylovirgula | -                                      | -   | -                                    | -   | -           | -   | -                 | -   | -             | -   | -               | -   |
| P30-C4  | Beijerinckiaceae-Methylovirgula | -                                      | -   | -                                    | -   | -           | -   | -                 | -   | -             | -   | -               | -   |
| P45-C2  | Beijerinckiaceae-Methylovirgula | -                                      | -   | -                                    | -   | -           | -   | -                 | -   | -             | -   | -               | -   |
| P45-C3  | Beijerinckiaceae                | -                                      | -   | -                                    | -   | -           | -   | -                 | -   | -             | -   | -               | -   |
| P30-B6  | Acetobacteraceae                | -                                      | -   | -                                    | -   | -           | -   | -                 | -   | -             | -   | -               | -   |
| P10-B3  | Acetobacteraceae-Acidisoma      | -                                      | -   | -                                    | -   | -           | -   | -                 | -   | -             | -   | -               | -   |
| P30-A1  | Acetobacteraceae-Acidisoma      | -                                      | -   | -                                    | -   | -           | -   | -                 | -   | -             | -   | -               | -   |
| P10-D4  | Mycobacterium                   | -                                      | -   | -                                    | -   | -           | -   | -                 | -   | -             | -   | -               | -   |
| P30-B1  | Mycobacterium                   | -                                      | -   | -                                    | -   | -           | -   | -                 | -   | -             | -   | -               | -   |
| P30-D6  | Mycobacterium                   | -                                      | -   | -                                    | -   | -           | -   | -                 | -   | -             | -   | -               | -   |
| P45-D6  | Mycobacterium                   | -                                      | -   | -                                    | +   | -           | -   | -                 | -   | -             | -   | -               | -   |

496
